# Supplementary material for: Agonist-induced functional analysis and cell sorting associated with single-cell transcriptomics characterizes cell subtypes in normal and pathological brain
Source: HighWire-hosted journal article supplement (doi:10.1101/gr.262717.120), 2020-09-24
Supplement: Supplemental_Table_S1.docx [file Supplemental_Table_S1.docx]

| **List of  RT-qPCR primers (5’ to 3’)** | | |
| --- | --- | --- |
| **gene** | **forward** | **reverse** |
| ***Calb2*** | TGATGCTGACGGAAATGGGT | GGACATCATGCCAGAACCCT |
| ***Gad2*** | TTGATGGGAAGCCTCAACACA | AGAGGCGGCTCATTCTCTCT |
| ***Gfap*** | CAGATCCGAGGGGGCAAA | TGAGCCTGTATTGGGACAACT |
| ***Grn*** | CGTGTGCCCTGATGCTAAGA | AGATGGCATTGGGCATTGGA |
| ***Itpr1*** | GGTTCAAGCACCTGGCTACA | GGTCCACTGAGGGCTGAAAC |
| ***Mbp*** | CCTCAGAGGACAGTGATGTGTTT | AGCCGAGGTCCCATTGTT |
| ***Meis2*** | GCCAAGGAGCAGCGTATAGT | ATTCCACTCATGGGTCCTGC |
| ***Mog2*** | GAGCTAAGAAACCCCTTTTGAGTG | GTCCACAGCAAAGAGGCCAA |
| ***Neurod1*** | ACCTTTTAACAACAGGAAGTGGA | CTCATCTGTCCAGCTTGGGG |
| ***Neurod2*** | CAAGAAGCGCGGGCCGAAGA | TTGGCCTTCTGTCGCCGCAG |
| ***Nrgn*** | TAGGCCAGAGCTGAACGTTTTA | GGAAGGAGGGGCTCACAAAC |
| ***Rapgef4*** | ATAAAAGGCCGTTGGAGCGA | TGACGAAGGAGGTTTGGGTG |
| ***Sox2*** | CACAACTCGGAGATCAGCA | CTCCGGGAAGCGTGTACTTA |
| ***Tbp*** | GGCGGTTTGGCTAGGTTT | GGGTTATCTTCACACAC |
|  |  |  |

**SUPPLEMENTAL TABLE S1**
