# Supplementary figures and images for: Agonist-induced functional analysis and cell sorting associated with single-cell transcriptomics characterizes cell subtypes in normal and pathological brain
Source: HighWire-hosted journal article supplement (doi:10.1101/gr.262717.120), 2020-09-24

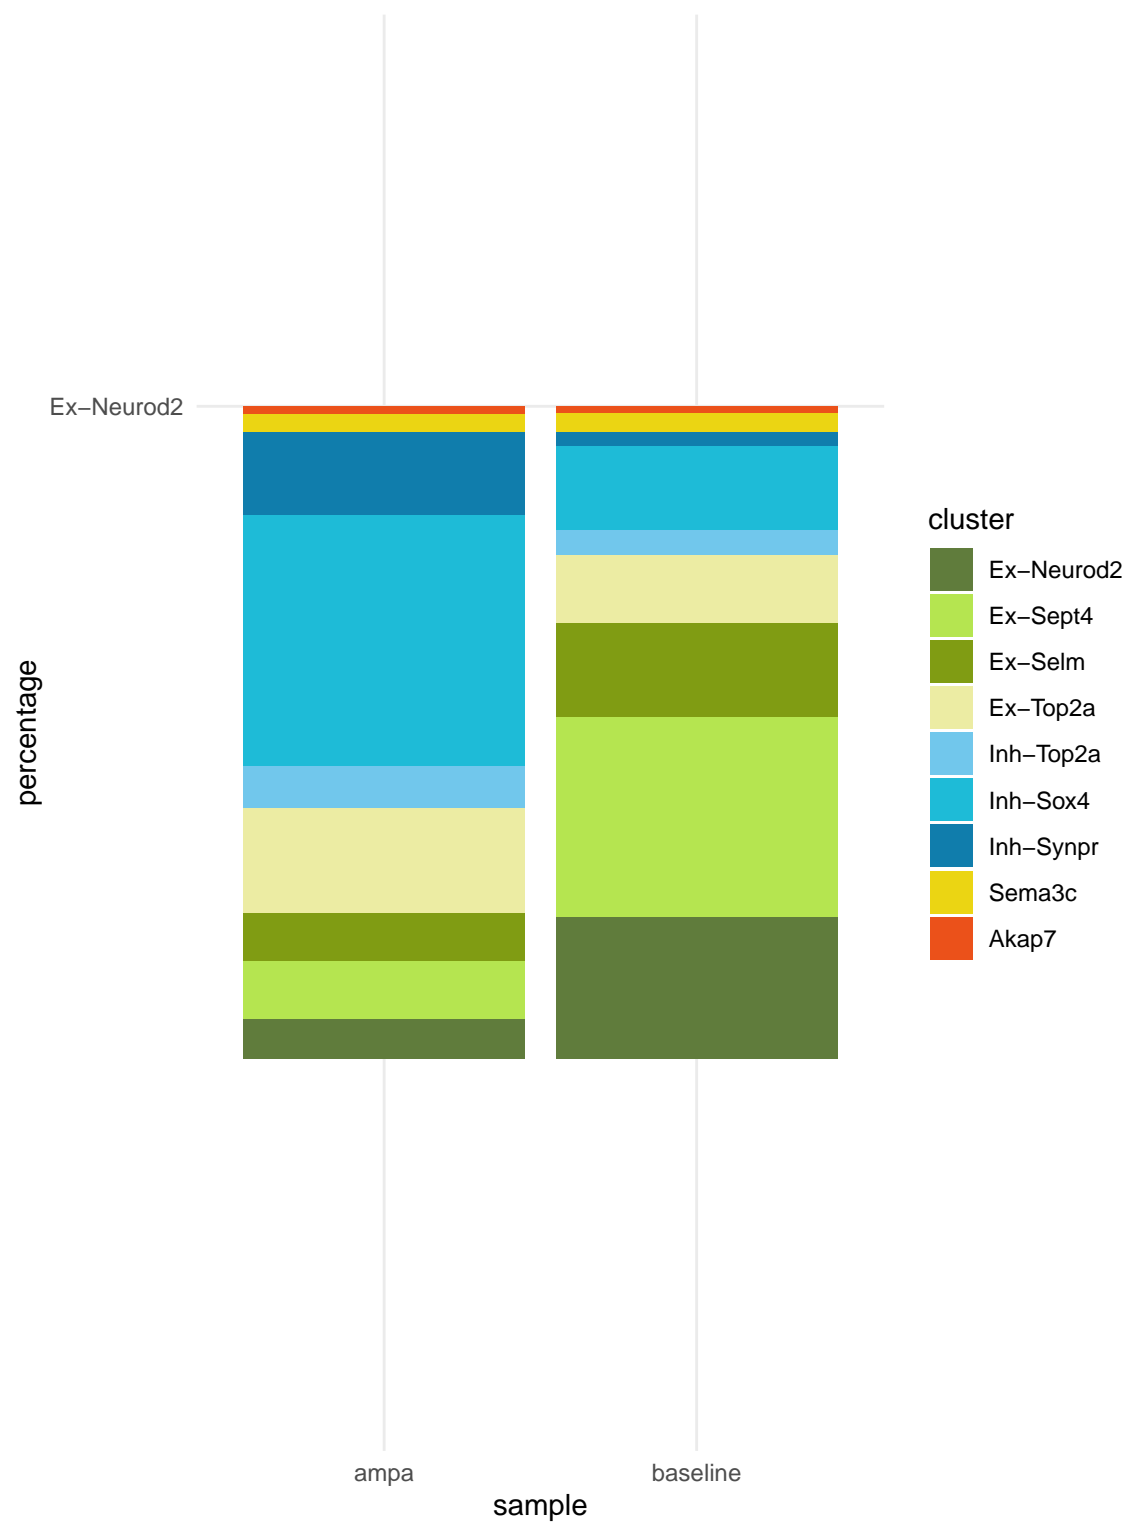

Supplement: Supplemental_code.zip [file barplot.pdf › sc.castagnola.2020/figures/barplot.pdf]

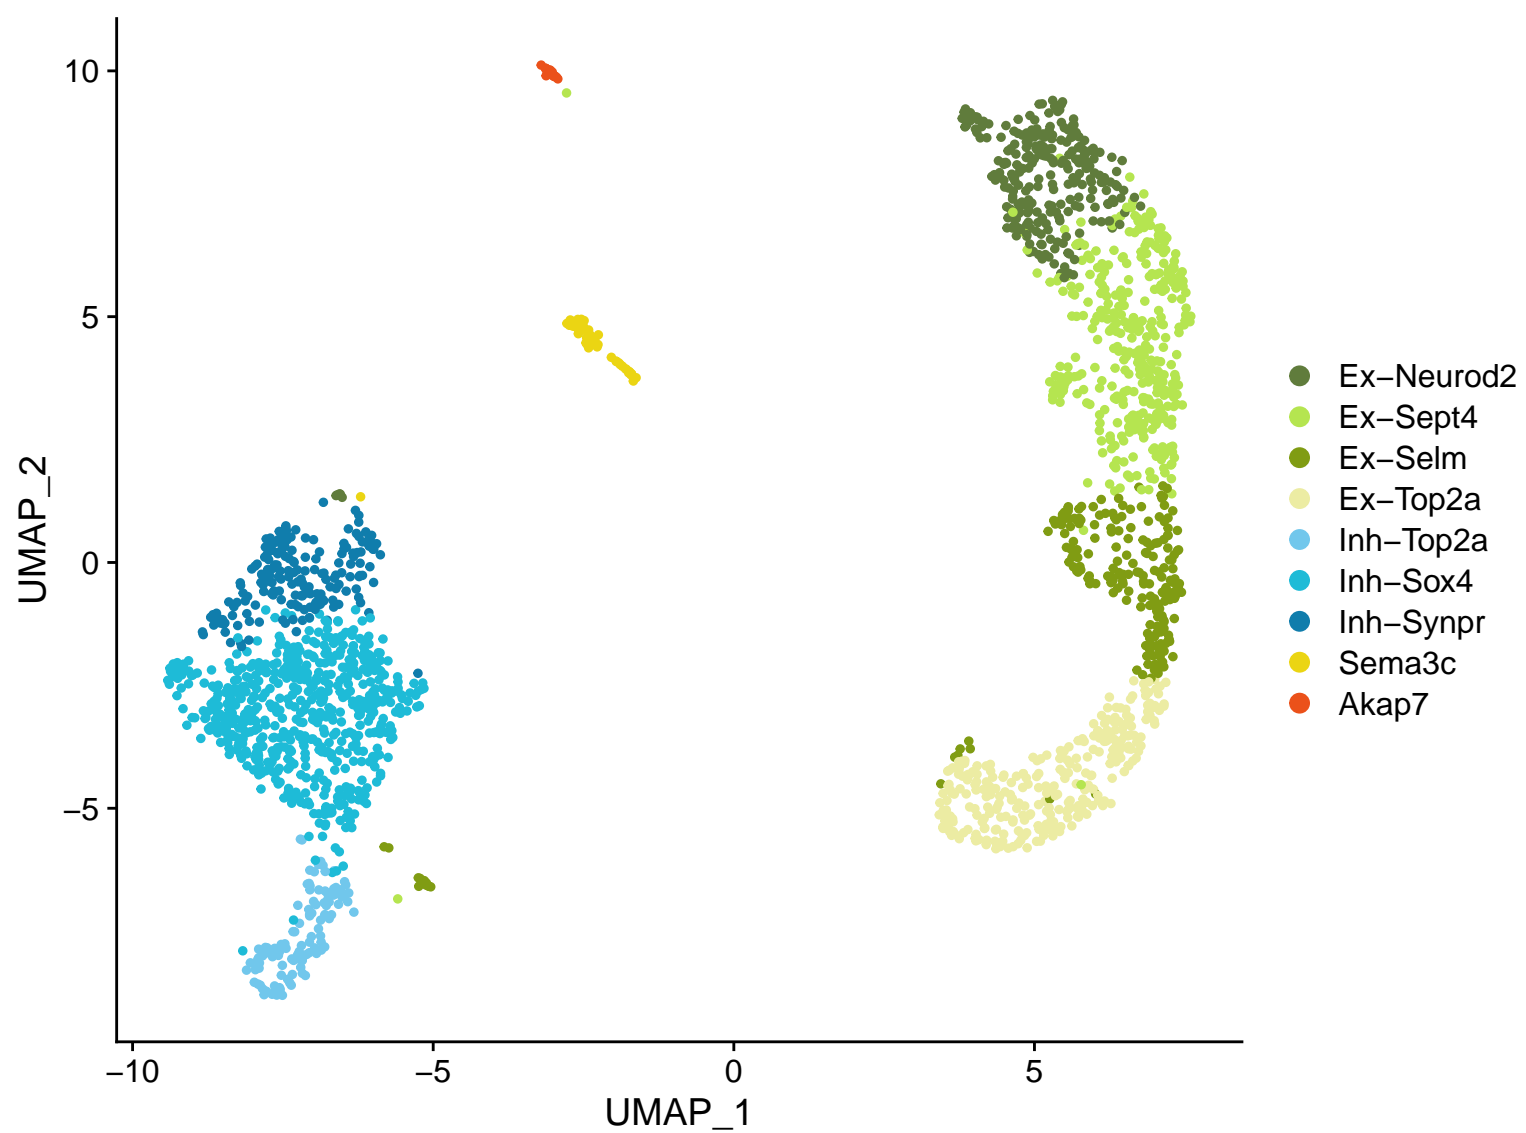

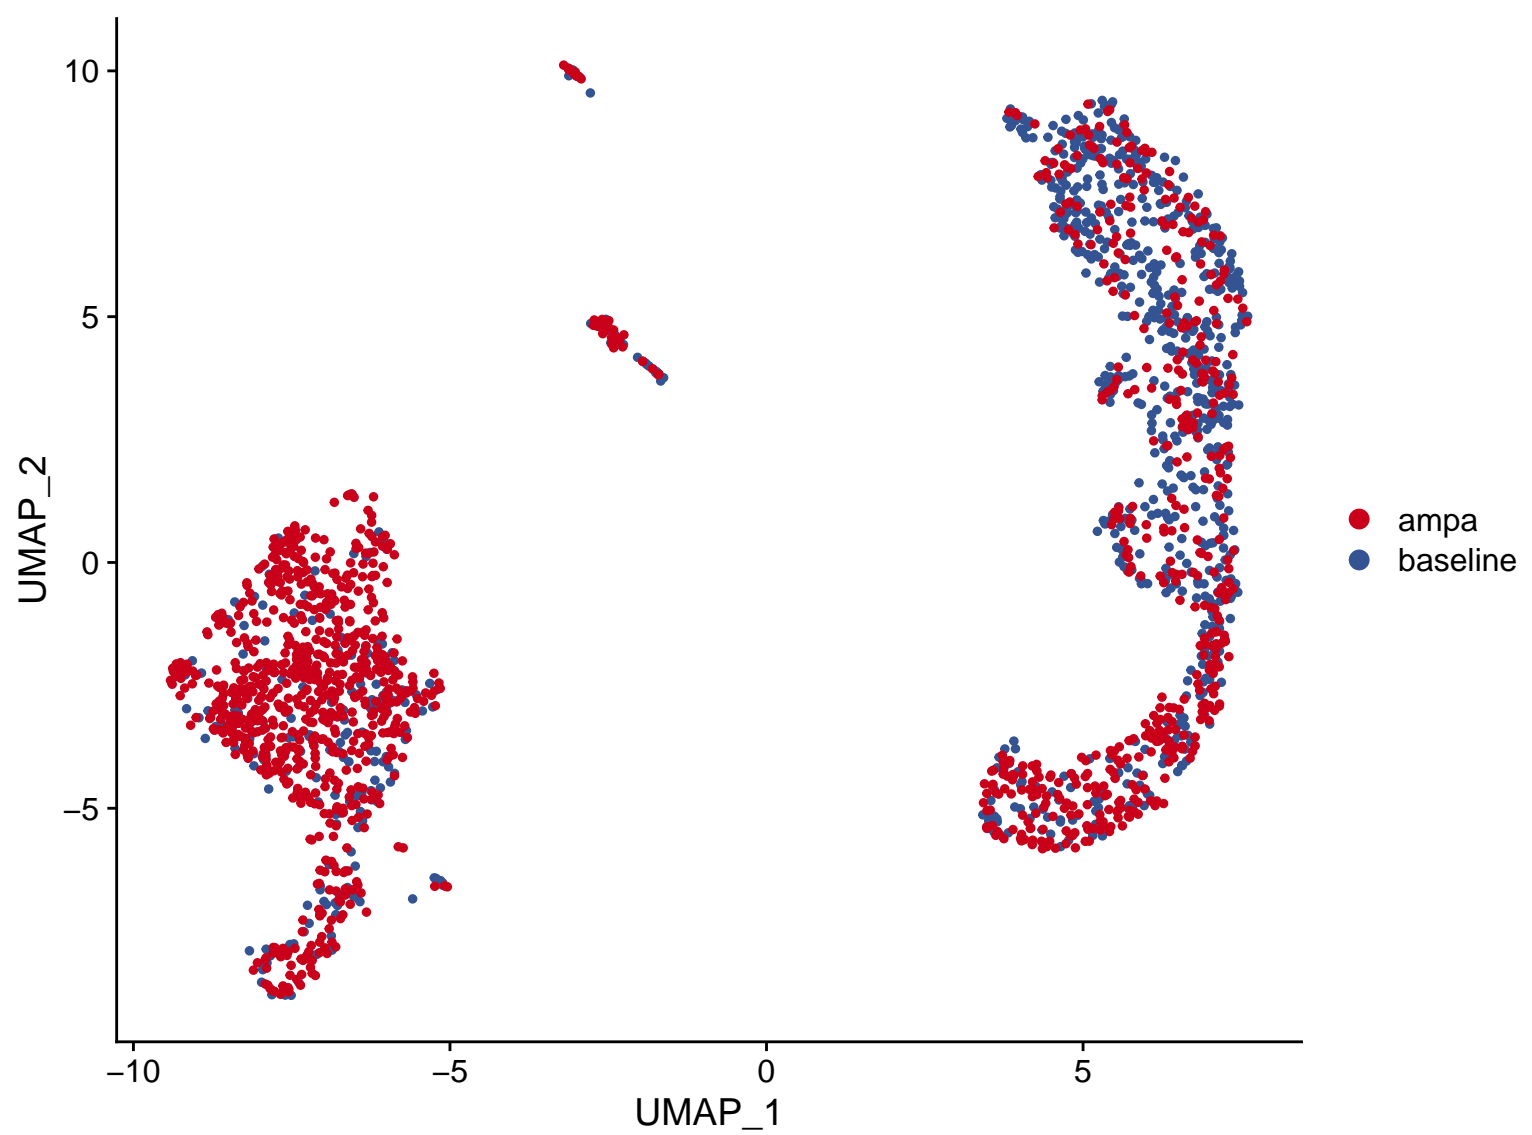

**Meis2**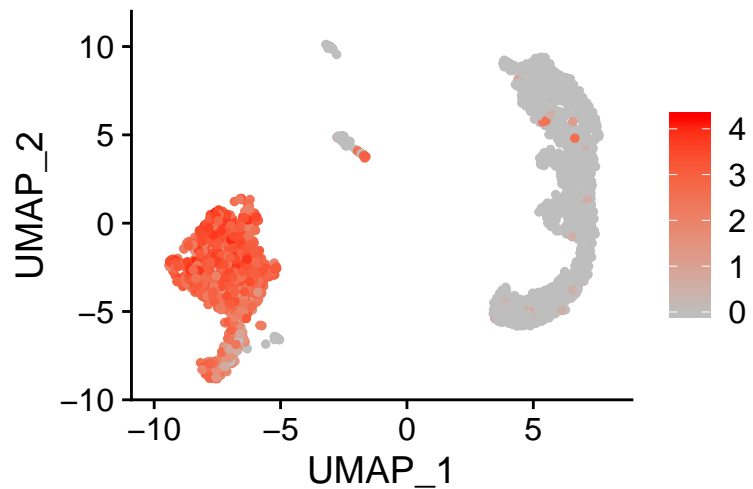**Neurod1**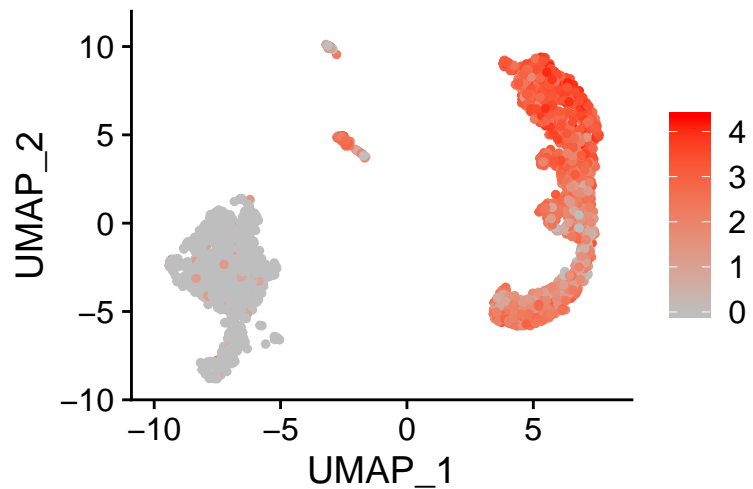**Neurod2**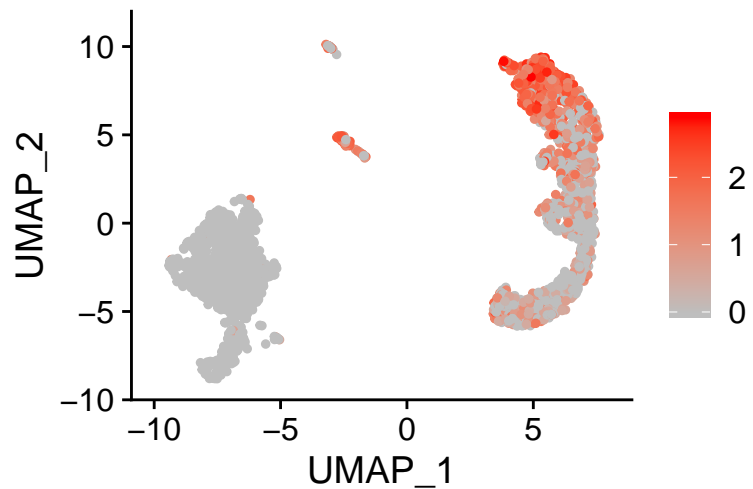**Gad2**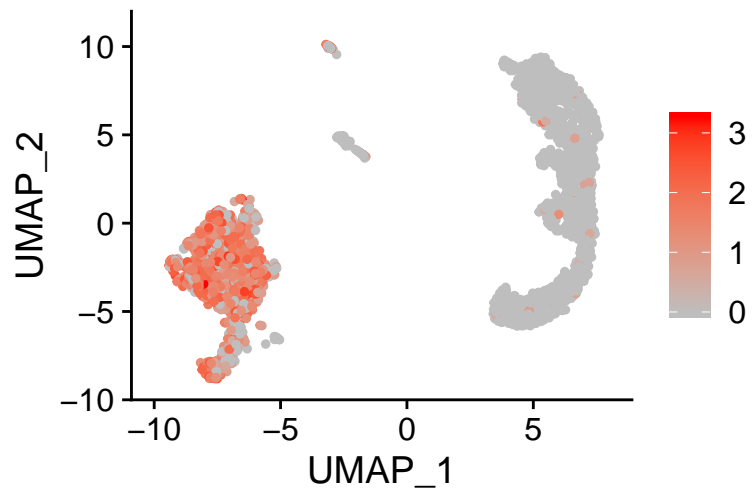

**Top2a**

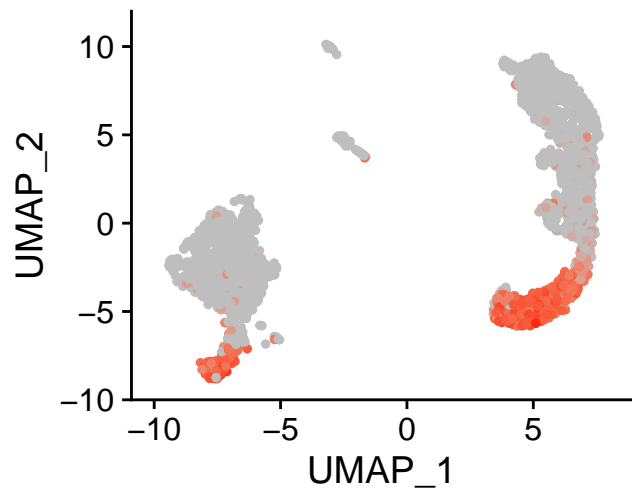

**Top2a**

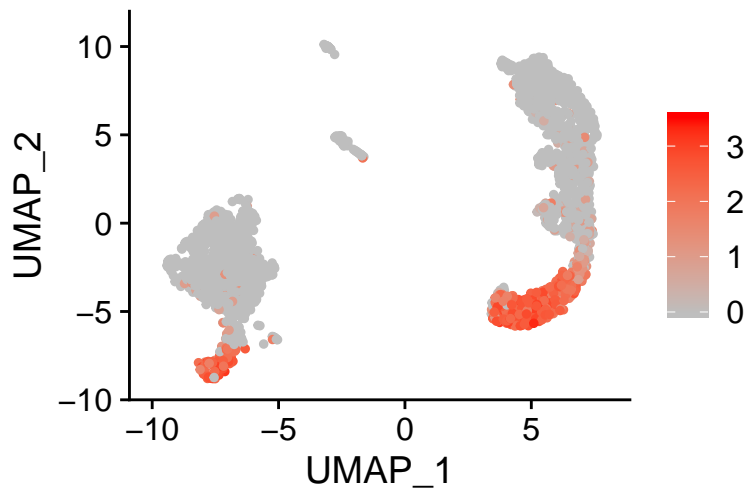

**Top2a**

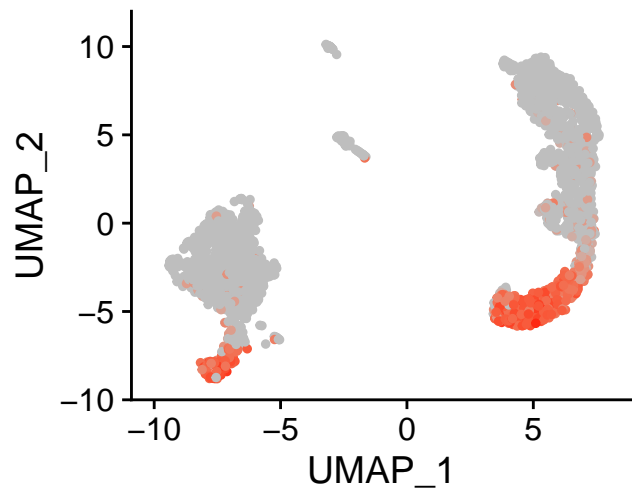

**Top2a**

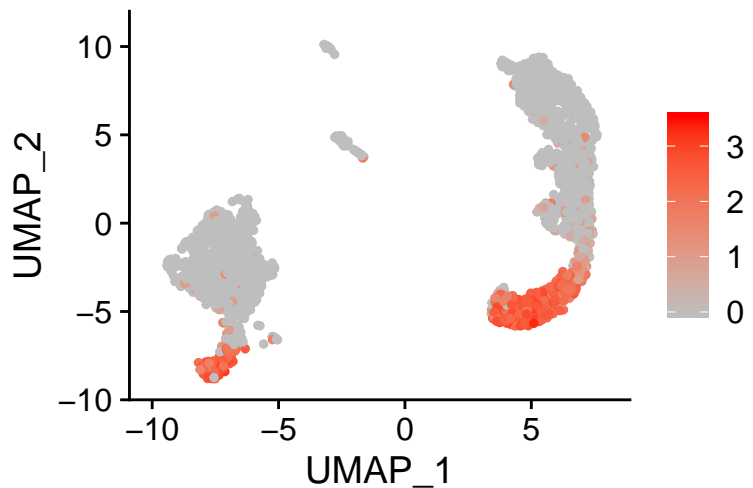

Supplement: Supplemental_code.zip [file figures.pdf › sc.castagnola.2020/figures/figures.pdf]

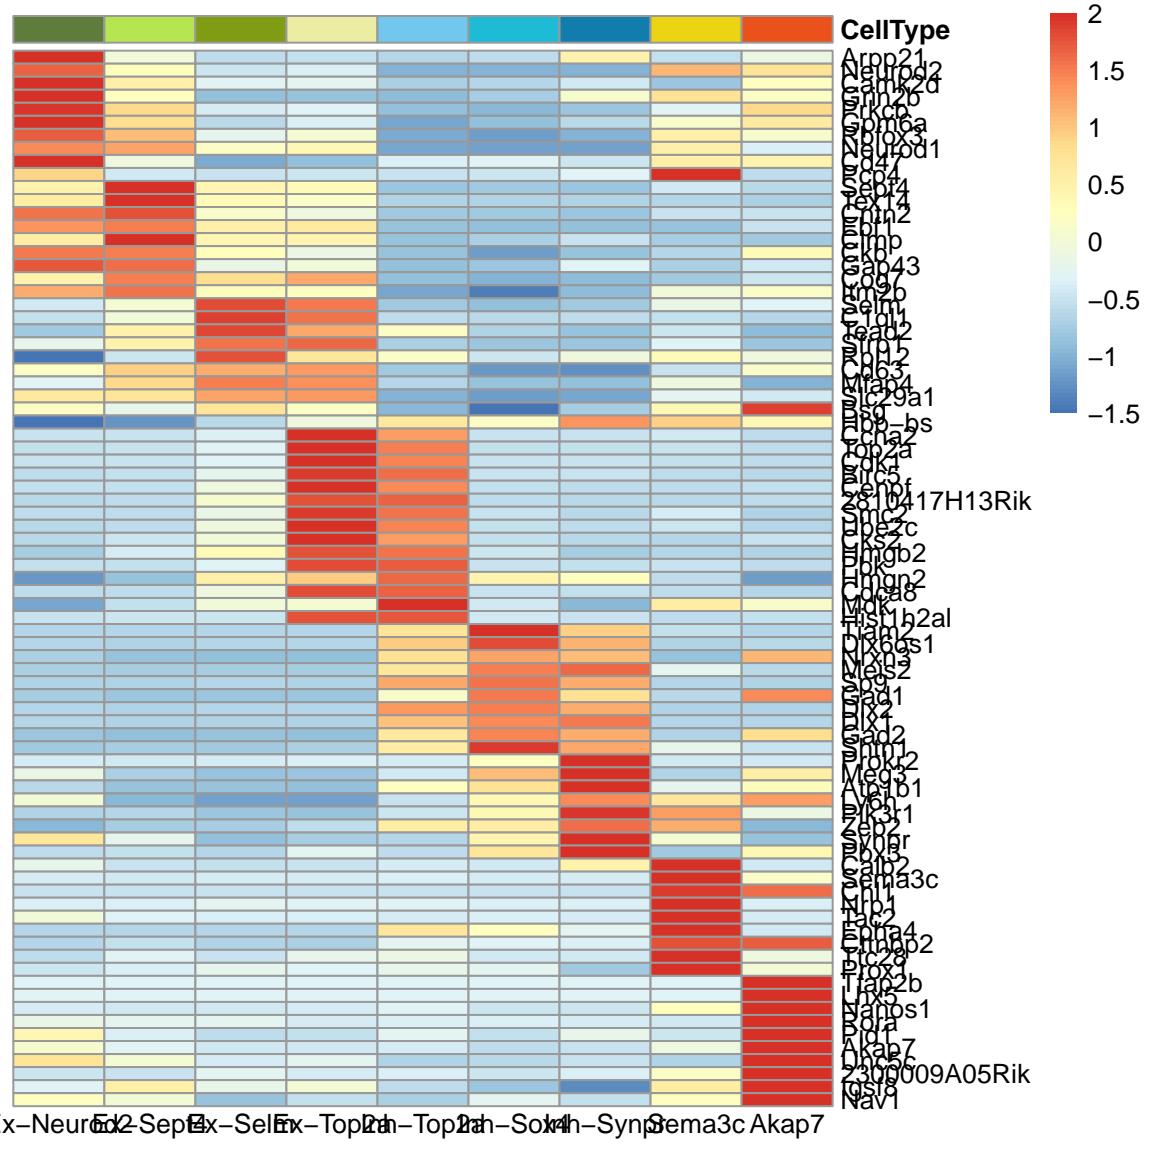

Supplement: Supplemental_code.zip [file heatmap.pdf › sc.castagnola.2020/figures/heatmap.pdf]

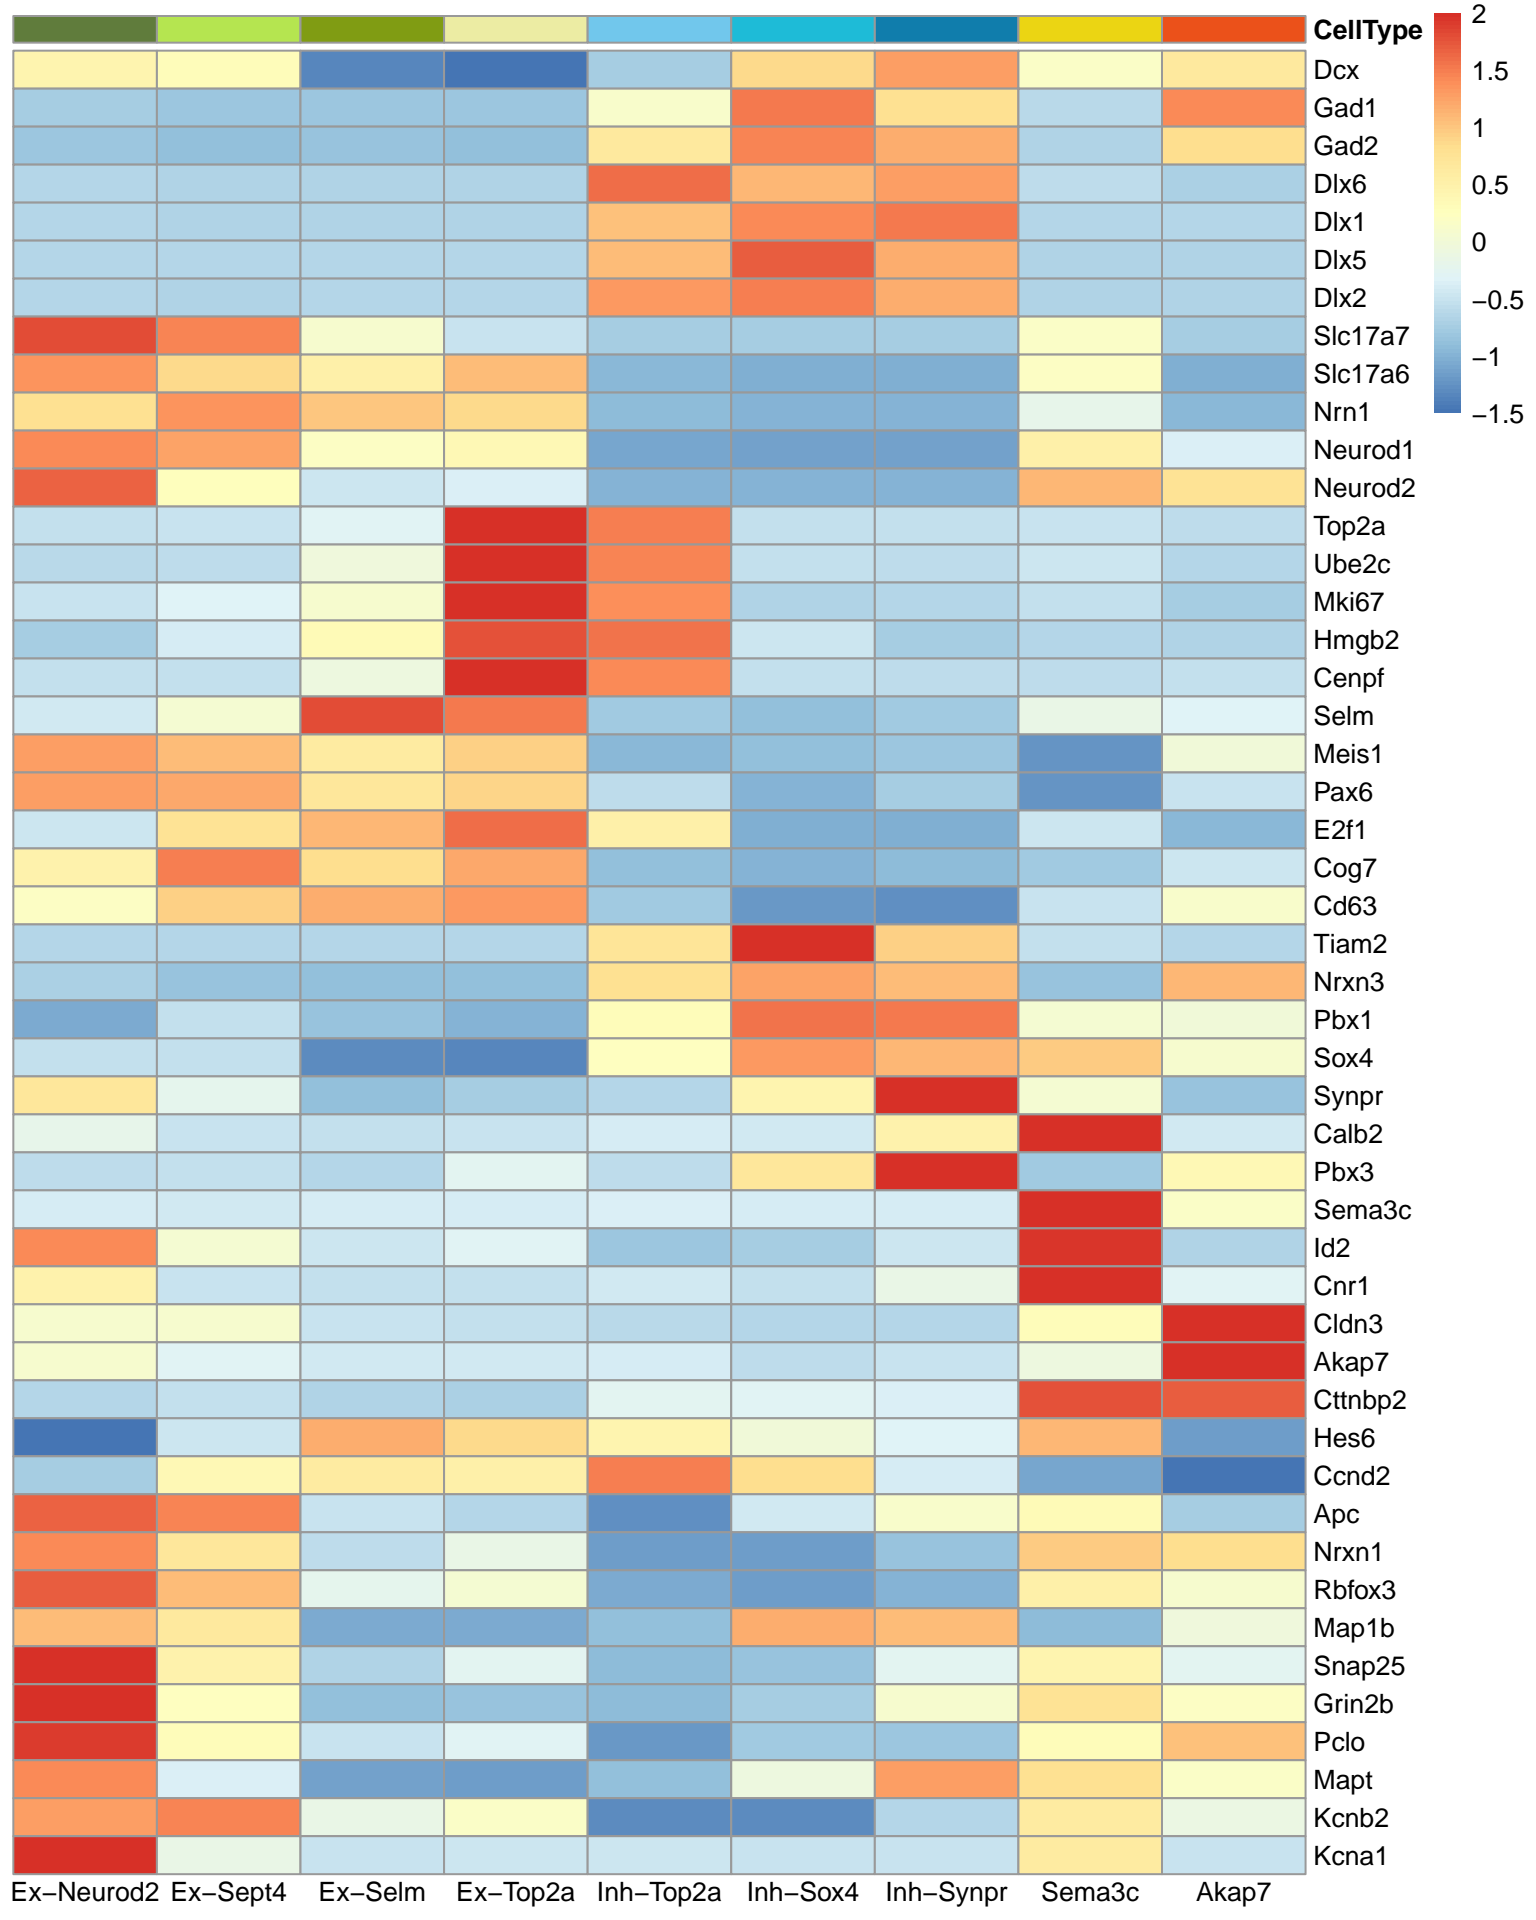

Supplement: Supplemental_code.zip [file heatmap2.pdf › sc.castagnola.2020/figures/heatmap2.pdf]
